# Supplementary material for: The association between C-reactive protein and coronary artery calcification: a systematic review and meta-analysis
Source: BMC Cardiovasc Disord. 2024 Apr 10;24:204. doi: 10.1186/s12872-024-03856-5 (PMC11007925; doi:10.1186/s12872-024-03856-5)
Supplement: Supplementary file 1 — Supplementary Material 1. [file 12872_2024_3856_MOESM1_ESM.docx]

**Supplementary file:** PRISMA checklist, NOS assessment of the studies, sensitivity analysis and table of Abbreviations are presented as a supplementary file.

**Appendix 1**

| **Section and Topic** | **Item #** | **Checklist item** | **Location where item is reported** |
| --- | --- | --- | --- |
| **TITLE** | | |  |
| Title | 1 | Identify the report as a systematic review. | P1 |
| **ABSTRACT** | | |  |
| Abstract | 2 | See the PRISMA 2020 for Abstracts checklist. | P2 |
| **INTRODUCTION** | | |  |
| Rationale | 3 | Describe the rationale for the review in the context of existing knowledge. | P3 |
| Objectives | 4 | Provide an explicit statement of the objective(s) or question(s) the review addresses. | P3 |
| **METHODS** | | |  |
| Eligibility criteria | 5 | Specify the inclusion and exclusion criteria for the review and how studies were grouped for the syntheses. | P5 |
| Information sources | 6 | Specify all databases, registers, websites, organisations, reference lists and other sources searched or consulted to identify studies. Specify the date when each source was last searched or consulted. | P5 |
| Search strategy | 7 | Present the full search strategies for all databases, registers and websites, including any filters and limits used. | P5 |
| Selection process | 8 | Specify the methods used to decide whether a study met the inclusion criteria of the review, including how many reviewers screened each record and each report retrieved, whether they worked independently, and if applicable, details of automation tools used in the process. | P5 |
| Data collection process | 9 | Specify the methods used to collect data from reports, including how many reviewers collected data from each report, whether they worked independently, any processes for obtaining or confirming data from study investigators, and if applicable, details of automation tools used in the process. | P5 |
| Data items | 10a | List and define all outcomes for which data were sought. Specify whether all results that were compatible with each outcome domain in each study were sought (e.g. for all measures, time points, analyses), and if not, the methods used to decide which results to collect. | P5 |
| 10b | List and define all other variables for which data were sought (e.g. participant and intervention characteristics, funding sources). Describe any assumptions made about any missing or unclear information. | P5 |
| Study risk of bias assessment | 11 | Specify the methods used to assess risk of bias in the included studies, including details of the tool(s) used, how many reviewers assessed each study and whether they worked independently, and if applicable, details of automation tools used in the process. | P5 |
| Effect measures | 12 | Specify for each outcome the effect measure(s) (e.g. risk ratio, mean difference) used in the synthesis or presentation of results. | P6 |
| Synthesis methods | 13a | Describe the processes used to decide which studies were eligible for each synthesis (e.g. tabulating the study intervention characteristics and comparing against the planned groups for each synthesis (item #5)). | P5 |
| 13b | Describe any methods required to prepare the data for presentation or synthesis, such as handling of missing summary statistics, or data conversions. | P5 |
| 13c | Describe any methods used to tabulate or visually display results of individual studies and syntheses. | P6 |
| 13d | Describe any methods used to synthesize results and provide a rationale for the choice(s). If meta-analysis was performed, describe the model(s), method(s) to identify the presence and extent of statistical heterogeneity, and software package(s) used. | P6 |
| 13e | Describe any methods used to explore possible causes of heterogeneity among study results (e.g. subgroup analysis, meta-regression). | P6 |
| 13f | Describe any sensitivity analyses conducted to assess robustness of the synthesized results. | P6 |
| Reporting bias assessment | 14 | Describe any methods used to assess risk of bias due to missing results in a synthesis (arising from reporting biases). | P5 |
| Certainty assessment | 15 | Describe any methods used to assess certainty (or confidence) in the body of evidence for an outcome. | P5 |
| **RESULTS** | | |  |
| Study selection | 16a | Describe the results of the search and selection process, from the number of records identified in the search to the number of studies included in the review, ideally using a flow diagram. | P7 |
| 16b | Cite studies that might appear to meet the inclusion criteria, but which were excluded, and explain why they were excluded. | P7 |
| Study characteristics | 17 | Cite each included study and present its characteristics. | P8- table 1 |
| Risk of bias in studies | 18 | Present assessments of risk of bias for each included study. | P8 – table 1 |
| Results of individual studies | 19 | For all outcomes, present, for each study: (a) summary statistics for each group (where appropriate) and (b) an effect estimate and its precision (e.g. confidence/credible interval), ideally using structured tables or plots. | P8 |
| Results of syntheses | 20a | For each synthesis, briefly summarise the characteristics and risk of bias among contributing studies. | P8 |
| 20b | Present results of all statistical syntheses conducted. If meta-analysis was done, present for each the summary estimate and its precision (e.g. confidence/credible interval) and measures of statistical heterogeneity. If comparing groups, describe the direction of the effect. | P9 |
| 20c | Present results of all investigations of possible causes of heterogeneity among study results. | P9 |
| 20d | Present results of all sensitivity analyses conducted to assess the robustness of the synthesized results. | P9 |
| Reporting biases | 21 | Present assessments of risk of bias due to missing results (arising from reporting biases) for each synthesis assessed. | P9 |
| Certainty of evidence | 22 | Present assessments of certainty (or confidence) in the body of evidence for each outcome assessed. | P9 |
| **DISCUSSION** | | |  |
| Discussion | 23a | Provide a general interpretation of the results in the context of other evidence. | P12 |
| 23b | Discuss any limitations of the evidence included in the review. | P15 |
| 23c | Discuss any limitations of the review processes used. | P15 |
| 23d | Discuss implications of the results for practice, policy, and future research. | P16 |
| **OTHER INFORMATION** | | |  |
| Registration and protocol | 24a | Provide registration information for the review, including register name and registration number, or state that the review was not registered. | P2 |
| 24b | Indicate where the review protocol can be accessed, or state that a protocol was not prepared. | P2 |
| 24c | Describe and explain any amendments to information provided at registration or in the protocol. | P2 |
| Support | 25 | Describe sources of financial or non-financial support for the review, and the role of the funders or sponsors in the review. | Not applicable |
| Competing interests | 26 | Declare any competing interests of review authors. | P17 |
| Availability of data, code and other materials | 27 | Report which of the following are publicly available and where they can be found: template data collection forms; data extracted from included studies; data used for all analyses; analytic code; any other materials used in the review. | P2 |

**Appendix 2**

**NOS score of cohort studies:**

|  | **Selection** | | |  | **Comparability** | **Outcome** | | | Study score |
| --- | --- | --- | --- | --- | --- | --- | --- | --- | --- |
| **Study** | Representativeness of  The exposed cohort | Selection of the non-Exposed cohort | Ascertainment of exposure | Demonstration that  The outcome of  Interest was not  Present at start of The study | Comparability of  Cohorts on the basis of design or analysis | Assessment of outcome | Was follow‐ up  Long enough  For the outcome to occur? | Adequacy of follow up of  cohorts |
| Hesum Lee/2021 | * | * | * | * | - | * | * | * | 8/9 |
| Irfan Zeb/2021 | * | * | * | * | * | * | * | * | 9/9 |
| Yun Ju Wu/2021 | * | * | * | - | * | * | * | * | 8/9 |
| Shuktika Nandkeolyar/2019 | * | * | * | * | * | * | * | * | 9/9 |
| Søren Zöga Diederichsen/2017 | * | * | * | - | * | * | * | * | 8/9 |
| So¨ren Gauss/2015 | * | - | * | - | * | * | * | * | 7/9 |
| Tochi M. Okwuosa/2012 | * | * | * | - | * | * | * | * | 8/9 |
| Mark Hamer/2012 | * | * | * | * | - | * | * | * | 8/9 |
| Allen J. Taylor/2008 | * | * | * | * | * | * | * | * | 9/9 |

**NOS score of cross-sectional studies:**

|  | **Selection** | | | **Comparability** | **Outcome** | | Study  score |
| --- | --- | --- | --- | --- | --- | --- | --- |
| Study | Representativeness of The exposed sample | Selection of the non-Exposed sample | Ascertainment of exposure | Comparability of Outcome groups on the  Basis of design or analysis | Assessment of outcome | Statistical test is appropriate |
| Sofa Cederström/2033 | * | * | * | ** | * | * | 7/7 |
| Youngmi Eun/2021 | * | * | * | ** | * | * | 7/7 |
| Mehmet Akif Erdol/2021 | * | * | * | ** | * | * | 7/7 |
| Antonia Anna Lukito/2020 | - | * | * | ** | * | * | 6/7 |
| Kelly Arps/2019 | * | * | * | ** | * | * | 7/7 |
| Cecillia Kimani/2019 | * | * | * | ** | * | * | 7/7 |
| Paulo H Harada/2019 | * | * | * | ** | * | * | 7/7 |
| Amirreza Sajjadieh/2019 | * | - | - | - | * | * | 3/7 |
| Anurag Mehta/2018 | * | - | * | ** | * | * | 6/7 |
| Antonio E. Pesaro/2018 | * | * | * | ** | * | * | 7/7 |
| Yao Wang Bing /2017 | * | * | * | ** | * | * | 7/7 |
| Hillard Kaplan/2017 | * | * | * | ** | * | * | 7/7 |
| Kun FU /2017 | * | * | - | ** | * | * | 6/7 |
| Byung Jin Kim/2017 | * | * | * | ** | * | * | 7/7 |
| Norman C. Wang/2016 | * | * | * | ** | * | * | 7/7 |
| Naga VA Kommuri/2016 | * | * | * | * | * | * | 6/7 |
| Kunwu Yu/2016 | * | * | * | ** | * | * | 7/7 |
| Jaewon Oh/2016 | - | * | * | * | * | * | 5/7 |
| GANG-YONG WU/2016 | * | * | * | * | * | * | 6/7 |
| Shin-ya Nagasawa/2015 | * | * | * | ** | * | * | 7/7 |
| Mette Hjortdal Sørensen/2014 | * | * | * | ** | * | * | 7/7 |
| Luiz A. Quaglia/2014 | - | * | * | ** | * | * | 6/7 |
| Leenhapong Navaravong/2014 | - | * | * | ** | * | * | 6/7 |
| K.-C. Sung/2014 | - | * | * | ** | * | * | 6/7 |
| Jan M Hughes-Austin/2014 | * | * | * | ** | * | * | 7/7 |
| Eun-Jung Rhee/2013 | * | * | * | ** | * | * | 7/7 |
| Zhengyun Zhang/2012 | - | * | * | ** | * | * | 6/7 |
| Zheng-Yun Zhang/2012 | - | * | * | ** | * | * | 6/7 |
| Muhei Tanaka/2012 | * | * | * | * | * | * | 6/7 |
| Asli I. Atar/2012 | * | * | * | ** | * | * | 7/7 |
| Lu-Qin Bian/2012 | * | * | * | ** | * | * | 7/7 |
| Dorette Raaz-Schrauder/2011 | * | * | * | ** | * | * | 7/7 |
| Wladimir M. Freitas/2011 | * | * | * | * | * | * | 6/7 |
| Tochi M. Okwuosa/2011 | * | * | * | ** | * | * | 7/7 |
| Atif N. Qasim/2011 | * | * | * | ** | * | * | 7/7 |
| Nancy Swords Jenny/2010 | * | * | * | ** | * | * | 7/7 |
| Allen J. Taylor/2008 | - | * | * | ** | * | * | 6/7 |
| Mahmoud M. Ramadan/2008 | * | * | * | ** | * | * | 7/7 |
| Amit Khera/2006 | * | * | * | ** | * | * | 7/7 |
| Po-Hsun Huang/2005 | * | * | * | * | * | * | 6/7 |
| Iftikhar J. Kullo/2003 | * | * | * | * | * | * | 6/7 |
| Muredach P. Reilly/2003 | * | * | * | ** | * | * | 7/7 |
| Thomas J. Wang/2002 | * | * | * | * | * | * | 6/7 |

**Appendix 3**

**Sensitivity analysis**


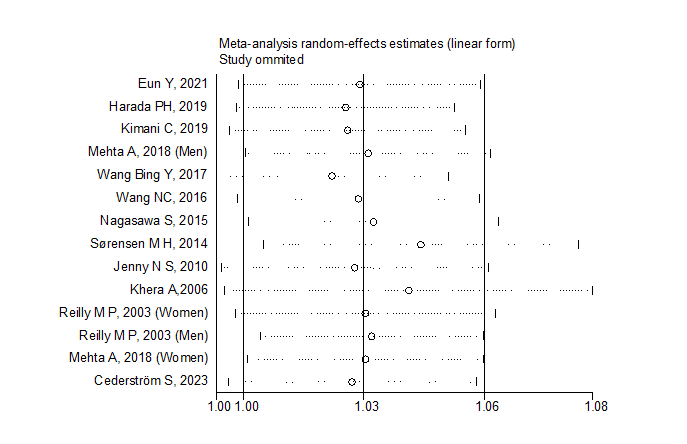


**Figure 3:** Sensitivity analysis of of the Simulation-based education interventions vs traditional approaches on boosting the self-confidence in nursing students (controlled experimental studies).

Sensitivity analysis showed the association between CRP and CAC was consistently (range of summary ORs: 1.01-1.04), indicating that the meta-analysis model was robust.


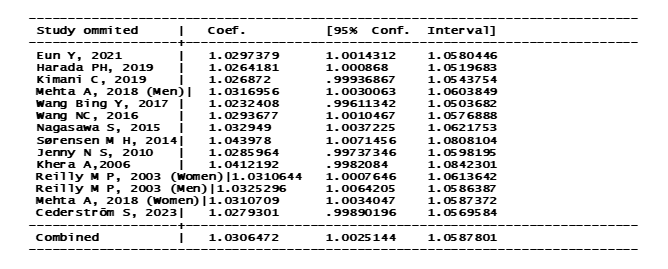


**Appendix 4**

**Abbreviations used in main text, tables, and figures:**

| CAC | Coronary Artery Calcification |
| --- | --- |
| CRP | C-Reactive Protein |
| NOS | Newcastle-Ottawa Scale |
| OR | Odds Ratio |
| hs-CRP | High Sensitivity C-Reactive Protein |
| CVD | Cardiovascular Disease |
| CAD | Coronary Artery Disease |
| EC | Endothelial Cell |
| NO | Nitric Oxide |
| IL-6 | Interleukin 6 |
| IL-1 | Interleukin 1 |
| TNF-α | Tumor Necrosis Factor α |
| CACS | Coronary Artery Calcium Score |
| PRISMA | Preferred Reporting Items for Systematic Reviews and Meta-analysis |
| PECO | Population, Exposure, Comparison and Outcome |
| CI | Confidence Interval |
| Log OR | Logarithm of Odds Ratio |
| MESA | Multi-Ethnic Study of Atherosclerosis |
| EISNER | Early Identification of Atherosclerosis by Noninvasive Imaging Research |
| PACC | Prospective Army Coronary Calcium |
| ERA-JUMP | Brazilian Longitudinal Study of Adult Health |
| SIRCA | Study of Inherited Risk of Coronary Atherosclerosis |
| GENOA | Genetic Network of Arteriopathy |
| FHS | Framingham Heart Study |
| DHS | Dallas Heart Study |
| SESSA | Shiga Epidemiological Study of Subclinical Atherosclerosis |
| MASALA | Mediators of Atherosclerosis in South Asians Living in America |
| SCAPIS | Swedish CArdioPulmonary bioimage Study |
| SWAN | Study of Woman’s Health Across the Nation |
| HDL-C | High Density Lipoprotein Cholesterol |
| LDL-C | Low Density Lipoprotein Cholesterol |
| BMI | Body Mass Index |
| AU | Agatston Units |
| SD | Standard Deviation |
| ASCVD | AtheroSclerotic CardioVascular Disease |
| PCI | Percutaneous Coronary Intervention |
| kDa | Kilo Daltons |
| PET | Positron Emission Tomography |
| N/A | Not announced |
| RR | Relative Risk |
| HR | Hazard Ratio |
| VSMCs | Vascualr smooth muscle cells |
